# Supplementary material
Source: HighWire-hosted journal article supplement (https://ez-admanager.com/highwire/filestream/136829/field_highwire_adjunct_files/0/barr_1634.pdf)
Supplement: barr_1634.pdf [file barr_1634.pdf]

# Un enfoque desde el neurodesarrollo de la evaluación cognitiva y de comportamiento en la epilepsia

William B. Barr, PhD  
Jana E. Jones, PhD

Correspondencia y solicitud de  
separatas alDr. Barr:william.barr@  
nyumc.org

*Neurology*® 2016;87:1634–1635

La epilepsia es un trastorno cerebral complejo que produce efectos distintivos en el neurodesarrollo, el comportamiento y la calidad de vida, dependiendo del momento de comienzo a lo largo de la vida. Las crisis continúan siendo la característica que define el diagnóstico clínico de epilepsia. Sin embargo, ha habido un cambio reciente desde clasificar y entender la epilepsia basado en los tipos de crisis, hacia un enfoque más fenomenológico y sindrómico, enfatizando una disrupción de redes como la causa de las crisis, además de las ya conocidas comorbilidades en la cognición y el comportamiento.<sup>1</sup> Mientras que el desarrollo de las neuroimágenes funcionales ha aportado un conocimiento sustancial en la composición y características de las redes neuroanatómicas responsables del desarrollo de las crisis,<sup>2</sup> la evaluación neuropsicológica, con el uso de tests neurocognitivos y psicológicos bien estandarizados, continúa aportando los medios más válidos y efectivos para evaluar la cognición y el comportamiento en pacientes con epilepsia, además de otros trastornos neurológicos.<sup>3</sup>

Hasta la fecha, los métodos prevalentes utilizados en la evaluación neuropsicológica de pacientes con epilepsia fueron desarrollados en un contexto quirúrgico, donde el perfil de déficits en la memoria y las funciones ejecutivas es utilizado para identificar la disfunción en redes frontotemporales lateralizadas asociadas con la localización del inicio de la crisis focal.<sup>3</sup> Mientras que las alteraciones en el comportamiento y el estado de ánimo son observadas frecuentemente en pacientes con epilepsia, estas alteraciones son conceptualizadas, en general, como paralelas a los déficits en la cognición, con poca integración entre ambas. De forma similar, mientras la edad de inicio de las crisis es una variable crítica en el desarrollo de comorbilidades cognitivas y de comportamiento en la epilepsia, hubo una falta de integración de factores del neurodesarrollo en la mayoría de los modelos de trastornos neuropsicológicos en epilepsia.

En este número de *Neurology*®, Rayner et al.<sup>4</sup> aportan un importante paso hacia el desarrollo

de un modelo de neurodesarrollo de las alteraciones cognitivas y de comportamiento en la epilepsia a lo largo de la vida. A través de su énfasis en el estudio de la memoria autobiográfica, estos autores identifican patrones distintivos de variables clínicas, trastornos cognitivos, y síntomas del estado de ánimo en pacientes adultos con epilepsia de comienzo en la infancia y en la adultez. La mayor implicancia de este estudio es que la integración de los factores relacionados del desarrollo, cognitivos y del estado de ánimo tienen el potencial de ayudarnos a identificar fenotipos más relevantes para clasificar y tratar las alteraciones de comportamiento en pacientes con epilepsia que lo que se ha conseguido a lo largo de los años usando un modelo limitado a la clasificación basada en el tipo de crisis.

Una característica única de este estudio es el foco de los autores en la evaluación de la memoria autobiográfica con pruebas neuropsicológicas estándar enfocadas en recordar listas de palabras, historias, o diseños de figuras. Los hallazgos primarios son que los pacientes con una epilepsia de inicio temprano demuestran alteraciones en la memoria autobiográfica asociados a otros marcadores de enfermedad crónica, incluyendo frecuencia de crisis. Por otro lado, aquellos pacientes con epilepsia de inicio en la adultez exhiben relaciones entre la memoria autobiográfica, la depresión y la presencia de una lesión identificada en RM. Otra implicancia, por lo tanto, es que el momento del inicio de la enfermedad determina los factores que probablemente influyan en las alteraciones de memoria de una manera apropiada al neurodesarrollo. La epilepsia de inicio temprano tiene el potencial de alterar las redes de neurodesarrollo responsables de la función normal de la memoria, mientras que la epilepsia de inicio tardío produce disfunción de la memoria secundaria a la condición psiquiátrica y la disrupción funcional de una red neurocognitiva ya desarrollada.

Los resultados de una encuesta reciente indican que solo el 4% de los neuropsicólogos practicantes en centros especializados de epilepsia

De los Departments of Neurology and Psychiatry (W.B.B.), NYU–Langone Medical Center and NYU School of Medicine, New York, NY; y el Department of Neurology (J.E.J.), University Hospital and University of Wisconsin School of Medicine and PublicHealth, Madison, WI. Ir a [Neurology.org](http://Neurology.org) para declaraciones de intereses completas. La información sobre fondos y aquellas declaraciones relevantes para los autores, si existiesen, se encuentran al final de la editorial.

incluyen una evaluación de la memoria autobiográfica como componente estándar de la batería de estudios para evaluar pacientes con epilepsia.<sup>5</sup> Hay ciertamente un número de desafíos inherentes a la evaluación de este tipo de memoria de una forma válida, con la necesidad común de verificar la información autobiográfica reportada por el paciente a través de una fuente colateral. Sin embargo, hay también un número de ventajas en cambiar el foco a la memoria autobiográfica, que utiliza una red de regiones cerebrales que pueden ser alteradas por múltiples factores, entre los que se incluyen las respuestas psicológicas y las disrupciones del neurodesarrollo.

Otra característica importante de este estudio yace en su énfasis en el delineamiento de fenotipos cognitivos con el potencial de resaltar enfoques para la clasificación y el tratamiento de trastornos de comportamiento en la epilepsia. La identificación de fenotipos cognitivos en la epilepsia no es nueva, ya que otros investigadores han identificado fenotipos cognitivos relevantes a los hallazgos neuroanatómicos de la RM estructural.<sup>6</sup> Los resultados de este estudio divergen de investigaciones previas en la integración del estado de ánimo y el comportamiento en su modelo fenotípico. Las implicancias para el tratamiento incluyen que las intervenciones educativas y farmacológicas enfocadas en modificar las alteraciones en la red de desarrollo podrían ser más apropiadas para los pacientes con epilepsia de inicio temprano, mientras que en la epilepsia de inicio tardío podría ser más apropiado el enfoque cognitivo-conductual y las intervenciones farmacológicas de la depresión, enfocándose en la prevención del desajuste psicológico provocado por las crisis desarrolladas en la adultez.

Como notan los autores, el hallazgo más remarkable de este estudio es que el momento de inicio de la enfermedad altera los factores que están implicados en la alteración de la memoria autobiográfica en la epilepsia. Si el área continúa desarrollando una comprensión de los fenotipos neurológico, cognitivo y neuropsiquiátrico de la epilepsia, podemos ser capaces de identificar los sustratos neurales que están involucrados y proveer un mejor entendimiento de cómo la epilepsia afecta la función a lo largo de la vida.

### FONDOS PARA EL ESTUDIO

No se reportan fondos para este estudio

### DECLARACIÓN DE INTERESES

Los autores no tienen nada para declarar relevante al manuscrito. Ir a [Neurology.org](http://Neurology.org) para declaraciones completas.

### BIBLIOGRAFÍA

1. Berg AT. Epilepsy, cognition, and behavior: the clinical picture. *Epilepsia* 2011;52(suppl 1):7–12.
2. Duncan JS, Winston GP, Koepp MJ, Ourselin S. Brain imaging in the assessment for epilepsy surgery. *Lancet Neurol* 2016;15:420–433.
3. Wilson SJ, Baxendale S, Barr W, et al. Indications and expectations for neuropsychological assessment in routine epilepsy care: report of the ILAE Neuropsychology Task Force, Diagnostic Methods Commission, 2013–2017. *Epilepsia* 2015;56:674–681.
4. Rayner G, Jackson GD, Wilson SJ. Mechanisms of memory impairment in epilepsy depend on age at disease onset. *Neurology* 2016;87:1642–1649.
5. Djordjevic J, Jones-Gotman M. Inquiry on assessments across epilepsy centers in different countries. In: Helmstaedter C, Hermann B, Lassonde M, Kahane P, editors. *Neuropsychology in the Care of People with Epilepsy*. Montrouge, France: John Libbey Eurotext; 2011:13–26.
6. Hermann B, Seidenberg M, Lee EJ, Chan F, Rutecki P. Cognitive phenotypes in temporal lobe epilepsy. *J Int Neuropsychol Soc* 2007;13:12–20. *Neurology*
